# Supplementary material for: Low-grade endotoxaemia enhances artery thrombus growth via Toll-like receptor 4: implication for myocardial infarction
Source: Oxford University Press journal article supplement (doi:10.1093/eurheartj/ehz893), 2019-12-10

**In vivo study**

*Study population*

In this case-control study, we prospectively screened, between January 2013 and 2016, 177 consecutive STEMI patients referred to the catheterization laboratory for primary percutaneous coronary intervention (PPCI), who had undergone manual thrombus aspiration and 100 consecutive patients with SA, undergoing elective diagnostic and/or interventional coronary procedure (PCI). Patients were recruited from three Centres: i) Department of the Heart and Great Vessels “Attilio Reale”, Sapienza -University of Rome; ii) Department of Internal Medicine, I Clinica Medica, Sapienza - University of Rome; iii) Department of Interventional Cardiology, Santa Maria University Hospital, Terni.

The present multicentre study was conducted according to the principles stated in the Declaration of Helsinki. The institutional review boards at each Institution approved this study, which was registered at ClinicalTrials.gov (Identifier: NCT03675789).

The diagnosis of STEMI was based on the current European Guidelines.1 SA was defined as reported in the ESC guidelines of stable coronary artery disease.2 Exclusion criteria for all groups were: estimated glomerular filtration rate less than 30 ml/min/m2, acute or recent systemic infections (3 weeks), treatment with systemic corticosteroids or oral anticoagulants, malignancy and lack of consent to participate.

Additional exclusion criteria for STEMI patients were: symptoms duration>12 h, rescue PCI, in-stent thrombosis and anatomical or technical difficulty in reaching the lesion. Among 80 STEMI patients who fulfilled the inclusion/exclusion criteria, 30 patients were ineligible because no material (n=20) or small sizes of aspirated samples (n=10) were obtained. Thus, 50 STEMI patients with sufficient thrombotic material (≥1 mm3) were enrolled (Figure 1).

All STEMI patients were treated with aspirin (250–300 mg p.o.), ticagrelor 180 mg loading dose and unfractionated heparin (1 mg/kg/i.v. or 0.7 mg/kg in patients receiving abcximab) on admission in the emergency room. All PPCI were performed through a radial or femoral access according to operator preference, using a 6 French catheter. After thrombus retrieval, patients with angiographic evidence of high thrombus burden and post-reperfusion microcirculatory impairment received intracoronary glycoprotein IIb/IIIa inhibitors administration. 1 None received thrombolysis therapy. Thrombus aspiration was performed prior to angioplasty using a suction catheter (ProntoV3® or Export®) whenever possible (when the anatomy of the coronary artery-curve and size- allowed it) in all patients with a TIMI Flow 0 and in all patients with a visible thrombus if TIMI Flow was 1 or more.

In addition, intracoronary blood samples were obtained from 50 out of 100 consecutive SA patients, scheduled for invasive evaluation; they were on double antiplatelet therapy, matched for age, sex and comorbidities with the STEMI patients and underwent elective coronary angioplasty.

Finally, as control group, we selected 50 outpatients without history of coronary heart disease, referring to the ambulatory of I Clinica Medica, Department of Internal Medicine and Medical Specialties, Sapienza-University of Rome, between January 2013 and January 2014, matched for age, gender and atherosclerotic risk factors. Patients and controls were recruited from the same geographic area and were all Caucasians. In all patients, cardiovascular risk factors and medical therapy on admission were carefully examined. Diabetes mellitus, dyslipidemia, smoking habit (current and previous habit), family history of early coronary heart disease (CAD) were defined as previously reported. 3-5 Time to PPCI was also recorded, as well as medications on admission. Moreover, echocardiographic left ventricular ejection fraction (LVEF) was assessed in all patients before PPCI and at discharge (by using 2D Simpson method). Before the procedure, all patients underwent peripheral blood sampling collection to measure biochemical variables.

*Coronary thrombi and intracoronary blood sampling*

After crossing of the target lesion of STEMI patients with the guide wire, the Pronto V3 extraction catheter (Vascular Solutions, Minneapolis, Minnesota, USA)was slowly advanced in aspiration two to five times (dependingon operator choice and on the angiographic result obtained)through the culprit lesion. In patients presenting STEMI, coronary thrombi, when present, or plaque fragments were aspirated from the culprit coronary artery before stent implantation and collected in EDTA tubes.

Thrombus aspirates from patients with STEMI were immediately processed. Thrombi were homogenized in 5 mL of a homogenization buffer consisting of 50 mmol L-1 Tris-HCl (pH 7.5), 0.25 mol L-1 sucrose, 2 mmol L-1 tris (2-carboxyethyl) phosphine HCl, 50 mmol L-1 NaF, 1 mmol L-1 sodium orthovanadate, 10 mmol L-1 sodium glycerophosphate, 5 mmol L-1 sodium pyrophosphate, Complete Protease Inhibitor Cocktail, 1 mmol L-1 benzamidine and 10 mmol L-1 phenylmethylsulfonyl fluoride (Sigma, USA).

Aliquots of thrombi homogenate were centrifuged at 13000 g for 10 min. Next, supernatant was removed and stored at -80°C until use.

In a subset of 12 patients, part of the thrombotic material was fixed in 4% buffered formaldehyde for histologic and immunohistochemical analyses.

In patients with SA, intracoronary blood samples were picked up directly using the guiding catheter in the coronary artery before stenting, and then collected in EDTA tubes and centrifuged at 300xg for 10 min. Next, supernatant was removed and stored at -80°C until use.

*Peripheral blood samples and laboratory assay*

Peripheral blood samples were drawn before the start of procedure in STEMI patients, or before balloon dilation and stenting in SA patients and then collected into tubes with or without 3.8% sodium citrate and EDTA tubes and centrifuged at 300×g for 10 min to obtain supernatant. Conversely, blood samples of controls group were obtained from patients after supine rest for at least 10 minutes and taken into tubes with or without 3.8% sodium citrate or in EDTA tubes and centrifuged at 300×g for 10 min to obtain supernatant. Plasma and serum aliquots were stored at -80°C in appropriate cuvettes until use.

Complete haemachrome, blood glucose, lipid profile, fibrinogen, creatinine, creatine kinase-MB, hsC-reactive protein (hs-CRP) and troponin T were evaluated using standard methods.

*Soluble P-selectin assay*

Plasma levels of soluble P-selectin (sP-selectin), a marker of platelet activation in vivo, were measured with a commercial immunoassay in aliquots of plasma of human and mice (DRG International, Springfield, USA), thrombus homogenate and intracoronary blood. Intra- and inter-assay coefficients of variation were <10%. The samples values were expressed in ng/ml. Thrombus and intracoronary levels of soluble P-selectin were normalized per 1 mg of protein.

*Serum and thrombus LPS assay*

LPS levels in serum (human and mice) and thrombus were measured using a commercial ELISA kit (Cusabio, Wuhan, China). The standards and samples were plated for 2 h at room temperature onto a micro-plate pre-coated with the antibody specific for LPS. After incubation, samples were read at 450 nm. Values were expressed as pg/ml; intra-assay and inter-assay coefficients of variation were <10%. The standards of this kit is LPS purified from Escherichia coli J5 according to manufactory instructions.

*Oxidized LDL assay*

Oxidized LDL (oxLDL) levels were measured with a commercial immunoassay (Cell Biolabs inc., San Diego, USA) in aliquots of serum, thrombus homogenate and intracoronary blood. Intra- and inter-assay coefficients of variation were <10%. The samples values were expressed in g/ml. Thrombus and intracoronary levels of oxLDL were normalized per 1 mg of protein.

*Zonulin assay*

Serum zonulin levels were measured using a commercially ELISA kit (Elabscience, Huston, USA). Antibody specific for zonulin were pre-coated onto a microplate and 100 µl of standards and were incubated 90 minutes at 37°C with patients’ sera samples. Then, a biotinylated detection antibody specific for zonulin and Avidin-Horseradish Peroxidase (HRP) conjugate was added to each microplate. The amount of zonulin was measured with a microplate auto-reader at 450 nm. Values were expressed as ng/ml; both intra-assay and inter-assay coefficients of variation were <10%.

***Soluble CD40L assay***

CD40 Ligand concentration were measured by an Immunoassay solid-phase ELISA designed to measure human soluble CD40 Ligand (sCD40L). (DRG International, Springfield Township USA)

An anti-human sCD40L coating antibody has been pre-coated onto 96-well plates and 100 μl of standards or 20 μl of sample was added.

Human sCD40L present in the sample or standard binds to antibodies adsorbed to the microwells and the HRP-conjugated anti-human sCD40L antibody is added and binds to human sCD40L captured by the first antibody. The reaction is terminated by addition of acid and absorbance is measured at 450 nm.

Values were expressed as ng/ml and the intra-assay and inter-assay coefficients of variation were 3,2 % and 4,3 % respectively.

***Tumor Necrosis Factor assay***

Tumor Necrosis Factor (TNF) concentration were measured using a commercially ELISA kit (Diaclone, Besancon, France). A capture antibody highly specific for TNF were pre-coated onto a microplate and 100 μl of standards or sample was added for 3 hours at room temperature. After incubation a biotililated anti-TNF secondary antibody and Avidin-Horseradish Peroxidase (HRP) conjugate was added to each wells. The amount of TNF was detected with a microplate auto-reader at 450 nm. Values were expressed as pg/ml and the intra-assay and inter-assay coefficients of variation were 3,2 % and 10,9% respectively.

***IL-1 assay***

IL-1 concentration were measured using a commercially ELISA kit (Booster Biological Technology, Pleasanton, CA, USA). A capture antibody specific for IL-1 were pre-coated in a 96-well plates and 100 μl of standards or sample was added for 120 minutes at room temperature.

After incubation an Anti-human IL-1 secondary antibody and Avidin-Horseradish Peroxidase (HRP) conjugate was added to each wells. The amount of IL-1 was detected with a microplate auto-reader at 450 nm. Values were expressed as pg/ml and the intra-assay and inter-assay coefficients of variation were 4,1 % and 5,8 % respectively.

***Tissue Factor antigen assay***

Tissue Factor (TF) antigen concentration were measured using a commercially ELISA kit (Origene Technologies, Rockville, MD, USA). A monoclonal antibody specific for TF has been pre-coated onto 96-well plates and 100 μl of standards or sample was added for 90 minutes at 37°C. After incubation a biotinylated detection polyclonal antibody specific for TF and Avidin-Horseradish Peroxidase (HRP) conjugate was added to each well. The amount of TF was detected with a microplate auto-reader at 450 nm. Values were expressed as pg/ml and the intra-assay and inter-assay coefficients of variation were 5,4 % and 6,9 % respectively.

*DNA Isolation and amplification*

DNA was extracted from 200µL serum by QIAamp DNAMini Kit (Qiagen, Hilden, Germany) following manufacturer’s instruction. DNA was eluted with 100µL of 70°C preheated water. The yield and purity of DNA were measured by reading A260 and A260/A280 in QIAexpert instrument (Qiagen, Hilden, Germany). A PCR reaction for specific amplification of a region of the 16S ribosomal RNA gene of Escherichia coli was developed. Five microliters of template were added into a reaction mix containing HotStarTaq Master Mix (Qiagen, Hilden, Germany) 10 μM forward and reverse primers with sequences AAACTCAAAKGAATTGACGG and TTACTCACCCGTICGCCRCT 6, respectively, to complete a final volume of 30µL. These primers amplify the V3 hypervariable region of 16S rRNA gene, with the expected product at 196 bp. An internal control was performed for each sample by beta-globin amplification using the following primers: forward 5’-ACACAACTGTGTTCACTAGC-3’, reverse 5’-GAAACCCAAGAGTCTTCTCT-3’. A 40-cycle PCR was run using the following profile: 94°C for 30 seconds, 50°C for 30 seconds, and 72°C for 60 seconds. Amplicons were run on agarose gel (2%). In each run a positive control was performed by using DNA extracted from Escherichia coli culture as template. 6

Before DNA amplification, some samples were spiked with 2.6ng to 5.2pg E.coli purified genomic DNA (equivalent to 5.2x105–103 genomic copies) and were amplified by 30 and 50 cycles giving no bands and non-specific bands at the lower quantity, respectively. Thus forty cycles were considered appropriate for bacterial amplification in serum samples.

To ensure unique band from the PCR, few samples were run with a 3,5% agarose gel. Most samples showed a unique band of 196 bp. Thus, routinely, we preferred to use a more easy handling 2% gel. Only in very few cases we co-amplified bands of about 1000bp that were easily resolved in a 2% agarose gel.

*Histologic and immunohistochemical analyses of aspirated thrombus fragments*

Histological examination was carried out on haematoxylin-eosin stained paraffin sections from thrombus fragments aspirated from a subset of 12 STEMI patients, with clinical characteristics similar to those of whole STEMI population. Immunohistochemistry was performed as follows: after rehydration and antigen retrieval (15 minutes at 700 Watts either in citrate buffer at pH 6.0 or in TRIS- EDTA citrate buffer at pH 7.8) slides were incubated 1 hour at room temperature with primary antibodies respectively to LPS (2D7/1, 1:50),TLR4 (76B357.1, 1:50) or Cathepsin G (19C3 1:500) (all from Abcam, Cambridge, UK), then washed in phosphate saline buffer and incubated 15 min with a secondary universal antibody (Dako, Glostrup, Denmark). Immunoreactions were detected with diaminobenzidine (Dako, Glostrup, Denmark). For each stain, a positive appropriate control was used.

*Isolation and oxidation of LDL*

Pooled human LDL was obtained from healthy subjects and blood was collected into tubes containing 7.2 mg EDTA. Blood was centrifuged at 1500g for 10 minutes at 4°C. Next, 250 μl of PBS containing 0.25 mM EDTA were stratified on 750 μl of plasma and tubes were centrifuged at 100000 rpm for 7 minutes. The upper 250 μl were removed to eliminate chylomicrons and another 250 μl of PBS containing 0.25 mM EDTA were added. Samples were centrifuged at 100000 rpm for 2.5 h. Next, 250 μl of the upper layer were removed and 150 μl of potassium bromide (KBr) (50%, w/v) were added to obtain a density of 1.063 g/ml. Samples were centrifuged at 100000 rpm for 5h and 200 μl were recovered as the fraction containing LDL. Finally, the fraction of LDL was dialyzed with PBS containing EDTA.

LDLs were oxidized by copper sulfate (CuSO4) and the degree of oxidation was evaluated by conjugated dienes formation using a UV/VIS spectrometer (UV1800, AOE Instruments (Shanghai) Co., Ltd). Measurement of the 234 nm absorption was read in cell supernatant after oxidation and expressed as micromoles of conjugated dienes. 7

*In vitro study for polymorphonuclear neutrophils (PMN)s/platelets aggregates*

Citrated blood samples were obtained from healthy subjects (n=5, males 3, females 2, age 44.3±10.4) and were incubated with LPS from *Escherichia coli* 0111:B4 (Sigma Aldrich, Sigma Cat# L3015, protein contamination <1%, diluted in ddH2O) (50 and 100 pg/ml) or oxLDL (10 and 20 µg/ml) in presence or less of specific cathepsin G inhibitor (cathepsin G inhibitor I, Calbiochem, 10 µM) or TLR4 inhibitor (InvivoGen, San Diego, USA, 1 µM).

After treatment with inhibitors and activation with LPS or oxLDL, 80 μL of blood samples were incubated for 20 minutes in the dark at room temperature with 5 μL of phycoerythin (PE)-conjugated mouse anti-human anti-CD61 mAb (Beckman Coulter, Brea, USA) in combination with 5 μL of FITC-conjugated CD11b (BD Biosciences, San Jose, USA) or isotype negative control IgG1-PE and IgG1-FITC respectively. Following incubation, samples were treated with 200 μl of 1X BD FACS lysing solution for 10 minutes at room temperature and then with 500 μl of 1% paraformaldehyde solution in PBS for further 10 minutes. Finally, samples were analysed immediately with a BD FACSCanto (BD Biosciences, San Jose, USA) equipped with an argon laser at 857 nm. PMNs/platelets aggregates were defined by double staining with both PMNs (anti-CD11b mAb) and platelets marker (anti-CD61 mAb). Data are shown as the percentage of aggregates (mean ± SD).

**In vivo model of thrombosis**

*Animal procedures*

In order to identify the amount of LPS, which was no lethal and elicited a blood concentration similar to that detected in STEMI patients, wild type C57BL6J mice, with normal LDL cholesterol values, were treated with several intraperitoneal (i.p.) injections of LPS. Once the LPS concentration was identified, animals were randomized to a low dose of LPS (0.5 mg/kg, n=10) or placebo (saline, n=10) for 2 hours, without a significant reduction in blood pressure, and then subjected to wire-induced endothelial damage for 5 hours, which was previously seen to induce vascular thrombosis, particularly in conditions of increased inflammation and platelet activation. 8 This dose of LPS resulted not toxic for mice. In a further set of experiments, mice were randomized to LPS alone or LPS+TLR4 inhibitor (0.5 mg/kg and 2 mg/kg, n=10 respectively) and subjected to wire-induced endothelial damage. After anaesthesia with ketamine and xylazine, mice were placed in a supine position with the right leg abducted and the knee bent. Under microscope magnification (20X), a straight, longitudinal skin incision was performed on the right leg from the knee to the groin and femoral artery was exposed. After exposure, proximal portion of femoral artery and proximal portion of saphenous artery were ligated with 9-0 nylon suture. A small incision was then made at the proximal portion of saphenous artery at a proximal level with respect to the surgical loop previously described. A wire of 0.4 mm was introduced from the incision though the femoral artery up to its proximal portion, just below the bifurcation with pudenda-epigastric trunk. The wire was then retracted and reintroduced for 3 times to induce endothelial damage. At the end of this procedure, the wire was pulled out and the proximal portion of saphenous artery was permanently ligated at a proximal level with respect to the incision used to introduce the wire. On the other hand, the surgical loop previously performed at the proximal portion of femoral artery was removed and blood flow restored. Skin wound was then surgically closed.

After 5 hours from endothelial damage, mice were immediately anesthetized again with ketamine and xylazine to undergo Doppler ultrasound analysis, which was conducted with a Visualsonic Vevo 3100®, using a 30-MHz probe. After the visualization of FA of the right leg by using the color-Doppler technique, peak blood flow velocity was measured at the mid portion level of the artery. Same procedure was then performed on the left leg, which was considered as the internal control. The ratio of the blood flow velocities of right vs. left FA was then calculated. We selected 5 hours as the experimental time point to evaluate femoral blood velocity after wire-induced damage since our preliminary studies indicated that after 5 hours the femoral thrombosis was partial, whereas longer time points were found to be associated with complete artery occlusion. Occlusion rate was calculated as percentage of thrombus size with respect to the whole arterial lumen in different sequential sections of FA. After echographic analysis, mice were euthanized and FA of the two legs were harvested and stored in OCT at -20°C to perform histological analyses. In particular, transversal sections of the arteries were prepared and hematoxylin eosin staining on sequential sections from different artery portions was performed to visualize the extent of thrombosis. The extent of thrombosis was calculated with ImageJ software, by measuring total lumen area and thrombus area within each artery tissue section. Percentage of occlusion was calculated by the ratio of thrombus area/total lumen area x 100. Finally, the average percentage of artery occlusion of different tissue sections of the same artery was calculated. At baseline and immediately before operation a blood sample was taken to measure circulating levels of LPS and sP-selectin, which were measured as above reported.

All animal procedures were approved by Ethical Committee of Italian Ministry of Health.

*Statistical analysis*

All continuous variables were tested for normality with the Shapiro-Wilk test. Continuous variables with normal distribution were expressed as means±standard deviation (SD). Non-parametric variables were expressed as median and interquartile range (IQR). Categorical variables were reported as counts (percentage). Differences between percentages were assessed by chi-square test or Fisher exact test. Student unpaired t test and ANOVA analysis with post-hoc Bonferroni test were used for normally distributed continuous variables. Appropriate nonparametric tests were employed for all the other variables. Factorial-ANOVA analyses were performed with two independent variables (group and smoking habit) after transforming not-normally distributed continuous depend variables (peripheral blood concentration of zonulin, LPS and sP-selectin) by a base 2 logarithm (Ln).Bivariate analysis was performed with Spearman rank correlation test. For the in-vitro studies, the Friedman test for the analysis of intragroup variations was used as an overall non-parametric ANOVA. In cases of significance, we compared pair related samples using the Wilcoxon test. The intergroup analysis was performed with the non-parametric Mann–Whitney U-test. Only p values <0.05 were regarded as statistically significant. All tests were 2-tailed, and analyses were performed using computer software packages (SPSS 25.0, IBM, NY, USA).

**References**

1. Ibanez B, James S, Agewall S, Antunes MJ, Bucciarelli-Ducci C, Bueno H, Caforio ALP, Crea F, Goudevenos JA, Halvorsen S, Hindricks G, Kastrati A, Lenzen MJ, Prescott E, Roffi M, Valgimigli M, Varenhorst C, Vranckx P, Widimský P, Collet J-P, Kristensen SD, Aboyans V, Baumbach A, Bugiardini R, Coman IM, Delgado V, Fitzsimons D, Gaemperli O, Gershlick AH, Gielen S. 2017 ESC Guidelines for the management of acute myocardial infarction in patients presenting with ST-segment elevation. Eur Heart J 2018;39:119–177.

2. 2013 ESC guidelines on the management of stable coronary artery disease. Eur Heart J 2013;34:2949–3003.

3. Catapano AL, Graham I, Backer G De, Wiklund O, Chapman MJ, Drexel H, Hoes AW, Jennings CS, Landmesser U, Pedersen TR, Reiner Ž, Riccardi G, Taskinen M-R, Tokgozoglu L, Verschuren WMM, Vlachopoulos C, Wood DA, Zamorano JL, Cooney M-T, ESC Scientific Document Group. 2016 ESC/EAS Guidelines for the Management of Dyslipidaemias. Eur Heart J 2016;37:2999–3058.

4. Menke A, Casagrande S, Geiss L, Cowie CC. Prevalence of and Trends in Diabetes Among Adults in the United States, 1988-2012. JAMA 2015;314:1021.

5. Piepoli MF, Hoes AW, Agewall S, Albus C, Brotons C, Catapano AL, Cooney M-T, Corrà U, Cosyns B, Deaton C, Graham I, Hall MS, Hobbs FDR, Løchen M-L, Löllgen H, Marques-Vidal P, Perk J, Prescott E, Redon J, Richter DJ, Sattar N, Smulders Y, Tiberi M, Worp HB van der, Dis I van, Verschuren WMM, Binno S, ESC Scientific Document Group. 2016 European Guidelines on cardiovascular disease prevention in clinical practice. Eur Heart J 2016;37:2315–2381.

6. Angus S V, Cho S, Harshman DK, Song J-Y, Yoon J-Y. A portable, shock-proof, surface-heated droplet PCR system for Escherichia coli detection. Biosens Bioelectron 2015;74:360–368.

7. Carnevale R, Pignatelli P, Lenti L, Buchetti B, Sanguigni V, Santo S Di, Violi F. LDL are oxidatively modified by platelets via GP91phox and accumulate in human monocytes. FASEB J 2007;21:927–934.

8. Danenberg HD, Szalai AJ, Swaminathan R V., Peng L, Chen Z, Seifert P, Fay WP, Simon DI, Edelman ER. Increased Thrombosis After Arterial Injury in Human C-Reactive Protein–Transgenic Mice. Circulation 2003;108:512–515.

**Figure legend**

**Figure 1.** **Study flow diagram**


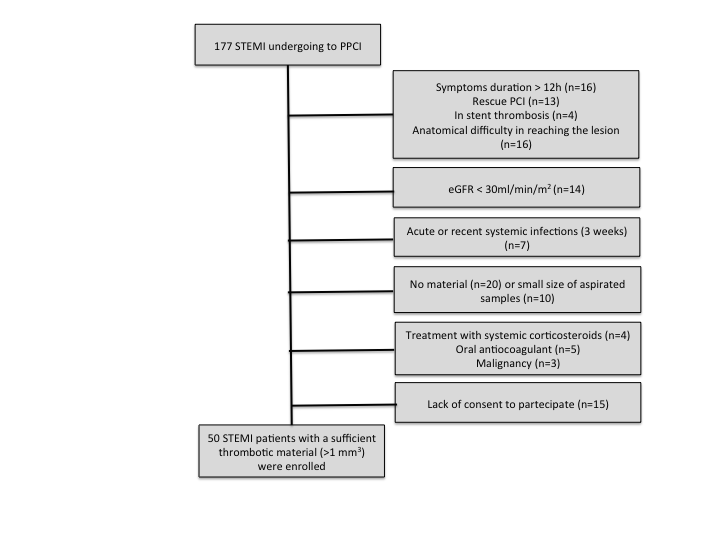

Supplement: eurheartj_41_33_3156_s9.doc [file eurheartj_41_33_3156_s9.doc]
